# Supplementary material for: Metastatic promoting role of Mesenchymal Stem Cells in Oral Squamous Cell Carcinoma Revealed by an Improved Bone Marrow Chimeric Model
Source: Research Square preprint supplement (doi:10.21203/rs.3.rs-8323433/v1), 2026-01-28
Supplement: Supplementary file 1 [file 297bdaa8cf244da00b3f9aa5.docx]

SUPPLEMENTAL FIGURES

| **Primary antibody** | **Immunized animal** | **Antigen retrieval** | **Dilution** | **Supplier** | **Uses** |
| --- | --- | --- | --- | --- | --- |
| GFP | Goat | Microwave heating in 0.01 mol/L citrate buffer (pH 6.0) at 100°C for 1 min | 1:1000 | Abcam | IHC/IF |
| (ab6673) |
| GFP | Rabbit | Microwave heating in 0.01 mol/L citrate buffer (pH 6.0) at 100°C for 1 min | 1:500 | MBL | IHC/IF |
| (MBL598) |
| LepR | Rabbit | Pressure cooker heating in 0.01 mol/L Tris EDTA buffer (pH 9.0) at 121°C for 8 min | 1:200 | Proteintech | IHC |
| (20966-1 AP) |
| SDF-1 | Rabbit | Microwave heating in 0.01 mol/L citrate buffer (pH 6.0) at 100°C for 1 min | 1:200 | Abcam | IHC |
| (ab9797) |
| CD4 | Rabbit | Microwave heating in 0.01 mol/L citrate buffer (pH 6.0) at 100°C for 1 min | 1:150 | Cell signaling technology | IHC |
| (D7D2Z) |
| CD8 | Rabbit | Microwave heating in 0.01 mol/L citrate buffer (pH 6.0) at 100°C for 1 min | 1:500 | Cell signaling technology | IHC |
| (D4W2Z) |
| CD20 | Rabbit | Microwave heating in 0.01 mol/L citrate buffer (pH 6.0) at 100°C for 1 min | 1:100 | Abcam | IHC |
| (ab64088) |
| CD11b | Rabbit | Microwave heating in 0.01 mol/L citrate buffer (pH 6.0) at 100°C for 1 min | 1:4000 | Abcam | IHC/IF |
| (ab133357) |
| Gr-1 | Rat | 0.1% trypsin at 37°C for 5 min | 1:200 | Biolegend | IHC/IF |
| (108401) |
| CD34 | Rat | Microwave heating in 0.01 mol/L citrate buffer (pH 6.0) at 100°C for 1 min | 1:500 | Abcam | IHC/IF |
| (ab8158) |
| CD105/Endoglin | Goat | 0.1% trypsin at 37°C for 5 min | 1:100 | R&D system | IHC/IF |
| (AF1320) |
| α-SMA | Rabbit | Microwave heating in 0.01 mol/L citrate buffer (pH 6.0) at 100°C for 1 min | 1:200 | Abcam | IHC/IF |
| (ab5694) |
| TNF- α | Rabbit | Microwave heating in 0.01 mol/L citrate buffer (pH 6.0) at 100°C for 1 min | 1:100 | Abc+E64:E65am | IHC/IF |
| (ab6671) |

**Supplemental Table S1: Primary antibodies used in IHC, double fluorescent and triple fluorescent IHC.**

| **Secondary antibody** | **Immunized animal** | **Fluorescent dye** | **Supplier** |
| --- | --- | --- | --- |
| Anti-rat IgG | Donkey | Alexa Fluor 594 | Thermo |
| (A21209) |
| Anti-goat IgG | Donkey | Alexa Fluor 488 | Thermo |
| (A11055) |
| Anti-rabbit IgG | Chicken | Alexa Fluor 488 | Thermo |
| (A21441) |
| Anti-rabbit IgG | Donkey | Alexa Fluor 647 | Thermo |
| (A31573) |
| Anti-rabbit IgG | Donkey | Alexa Fluor 568 | Thermo |
| (A10042) |

**Supplemental Table S2: Secondary antibodies used in double fluorescent and triple fluorescent IHC.**
