# Supplementary material for: Metastatic promoting role of Mesenchymal Stem Cells in Oral Squamous Cell Carcinoma Revealed by an Improved Bone Marrow Chimeric Model
Source: Research Square preprint supplement (doi:10.21203/rs.3.rs-8323433/v1), 2026-01-28
Supplement: Supplementary file 2 [file 47f8d3e220c3b23fc7dc372c.docx]

**SUPPLEMENTAL FIGURE LEGENDS**

**
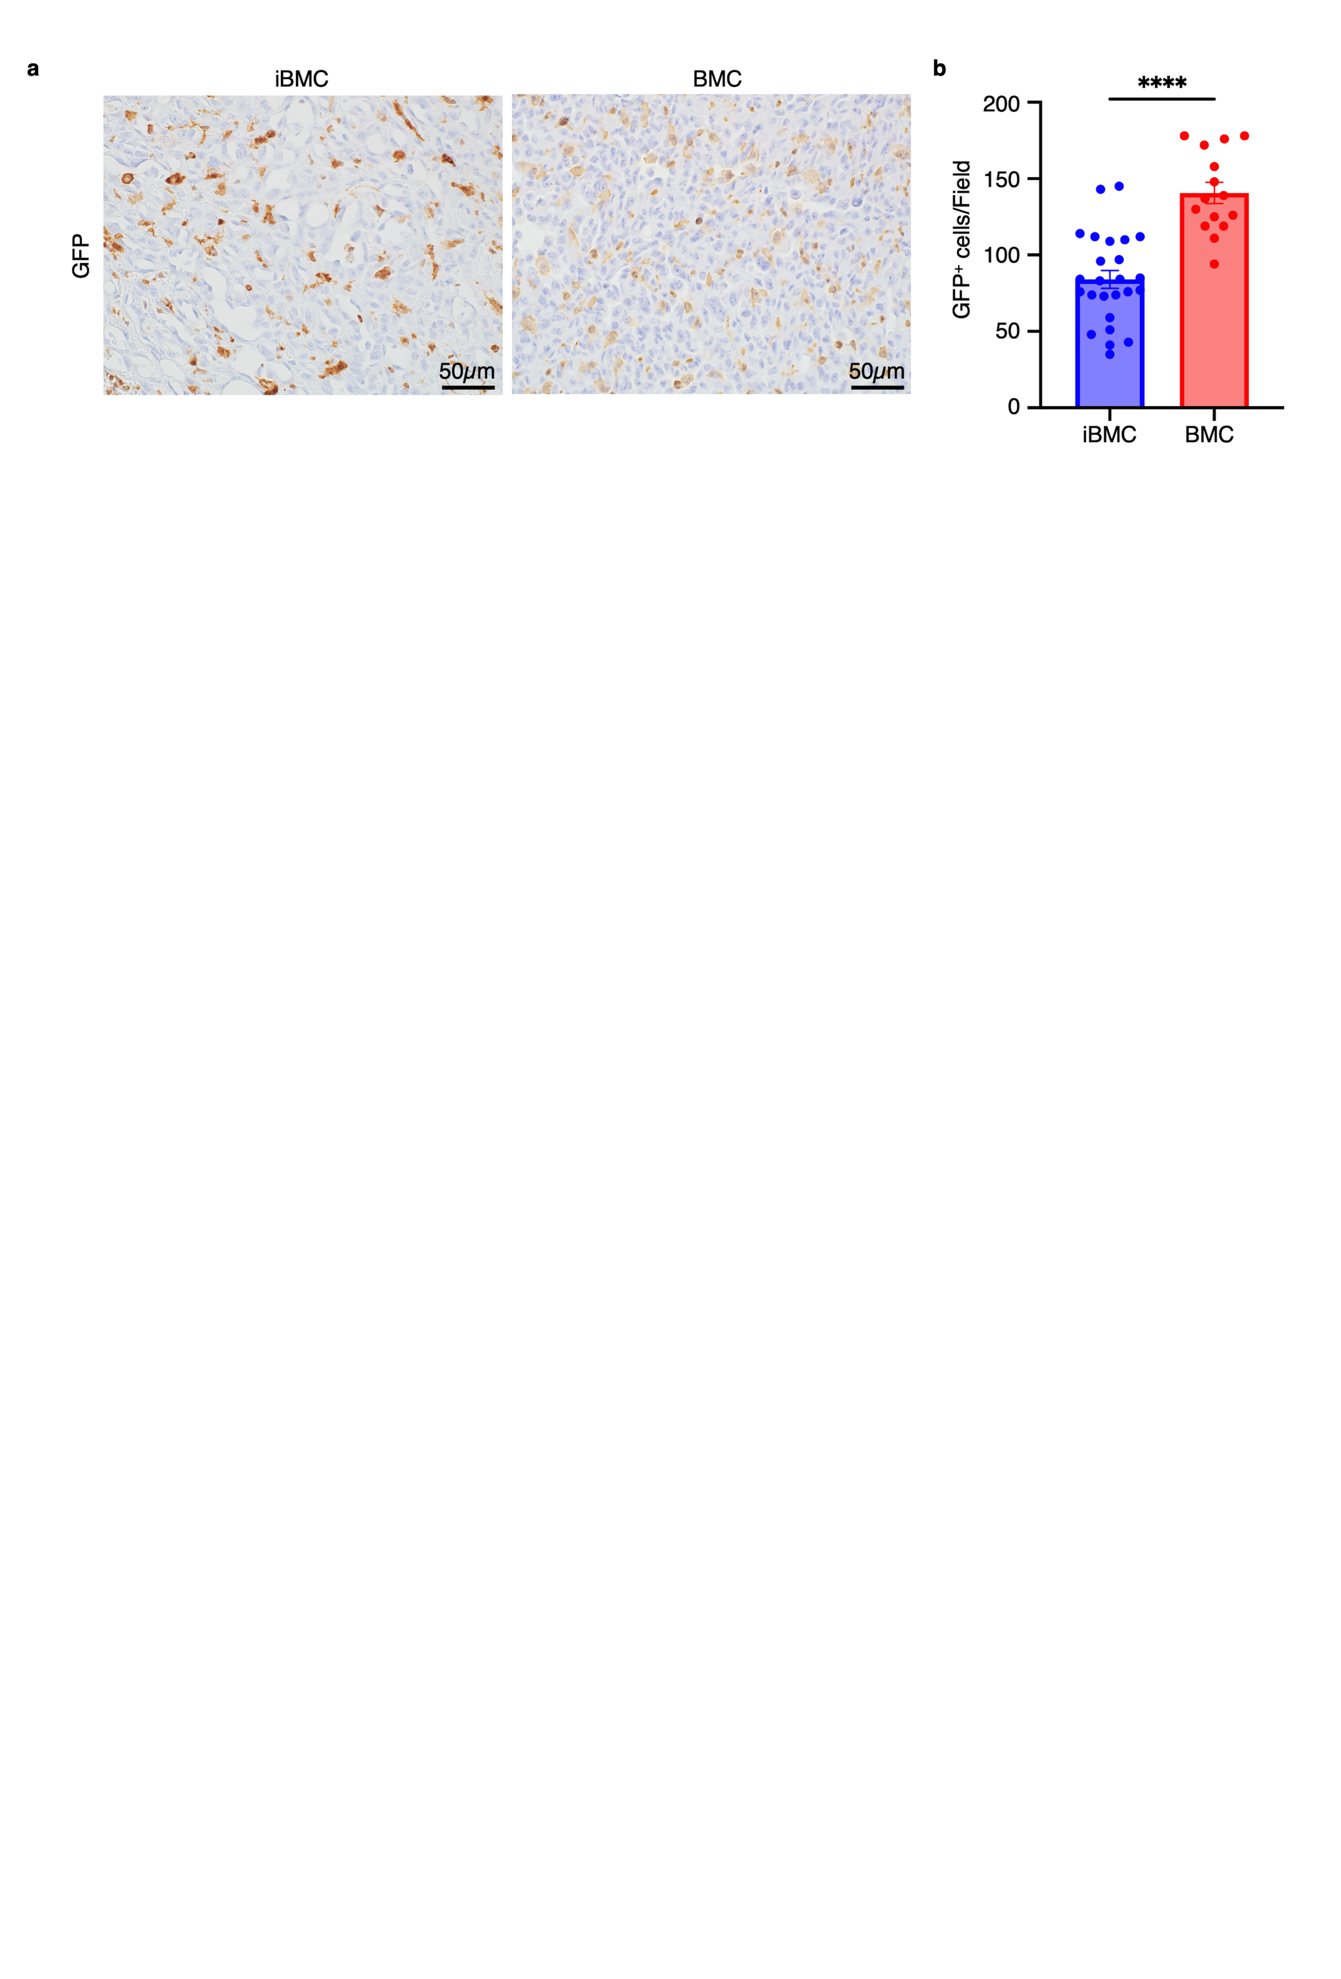
**

**Supplemental figure S1. Characteristics of bone marrow-derived cells in iBMC and BMC tumours.**

**A.** Representative images and **B.** the number of GFP+ cells per field in wild, iBMC, and BMC tumours.

All data are presented as mean±SEM. Statistical analysis was done using Student's t-test. ****p<0.0001.
